# Supplementary material for: KSHV induces immunoglobulin rearrangements in mature B lymphocytes
Source: PubMed Central journal article supplement (PMC5919685; doi:10.1371/journal.ppat.1006967), 2018-04-16

A

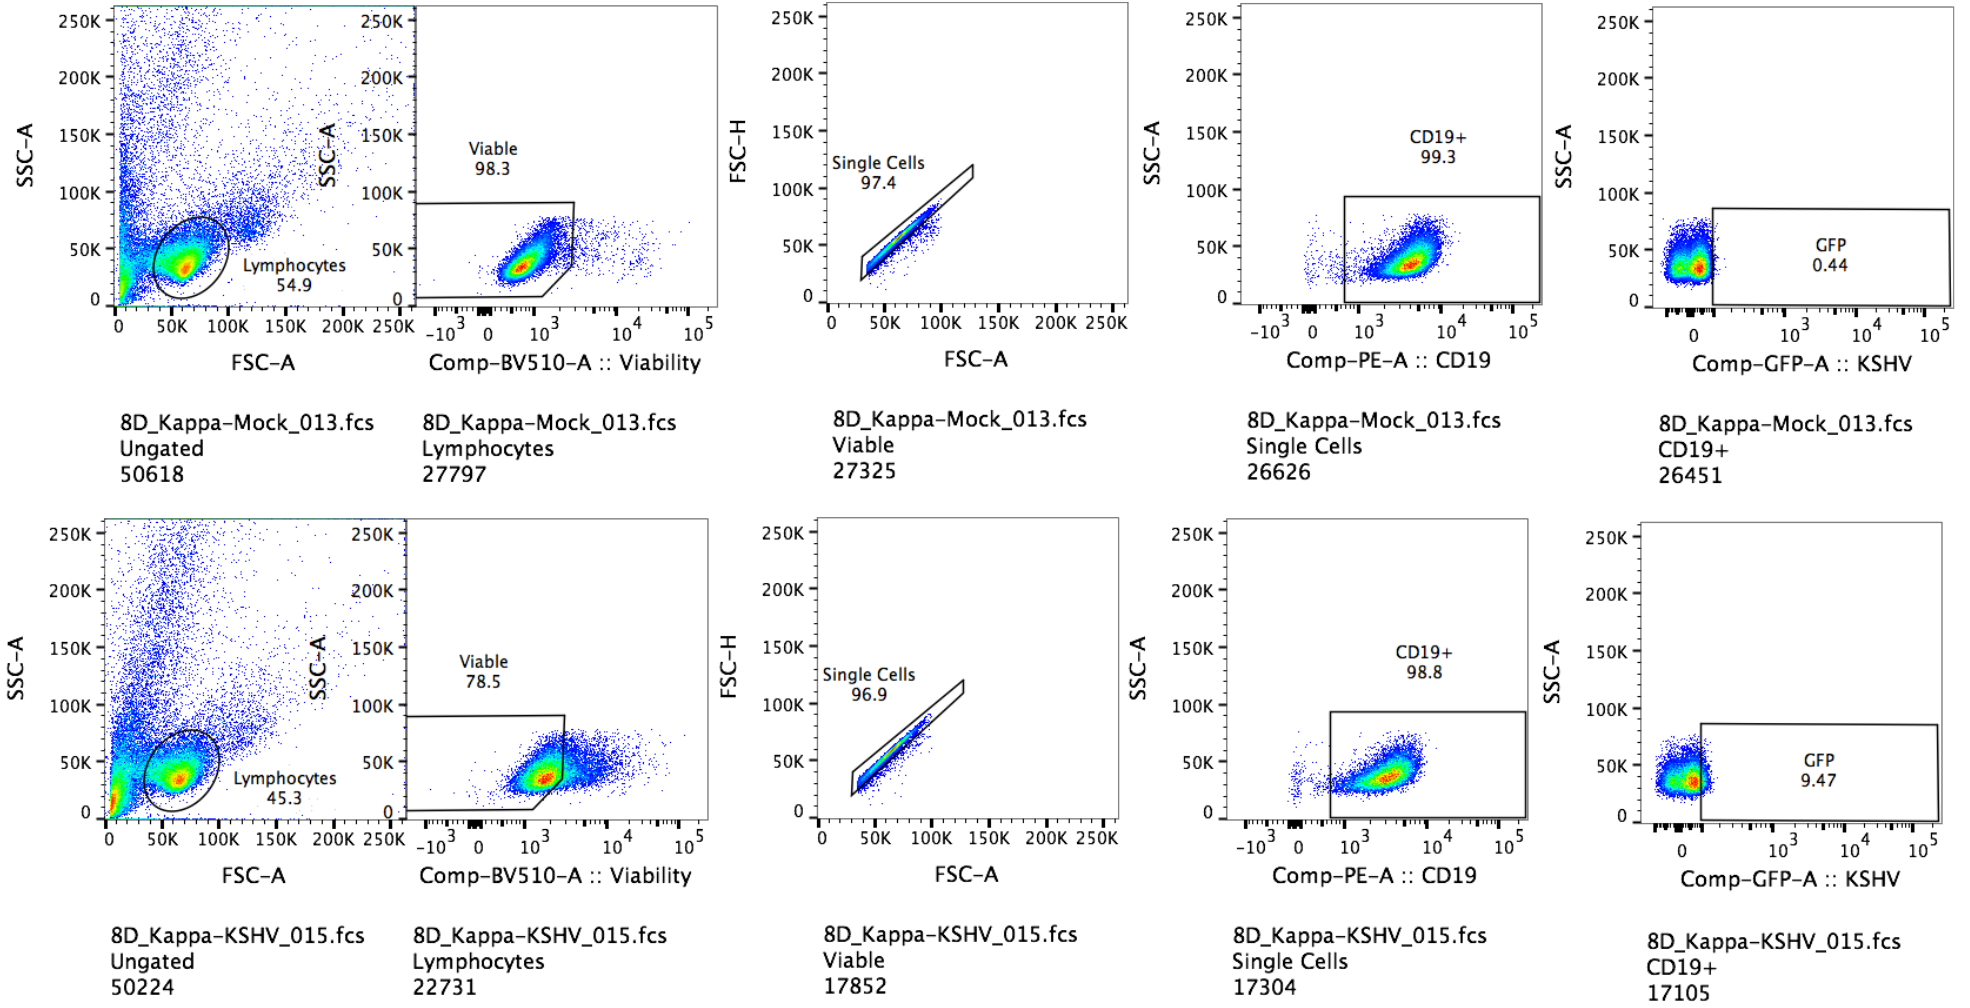

B

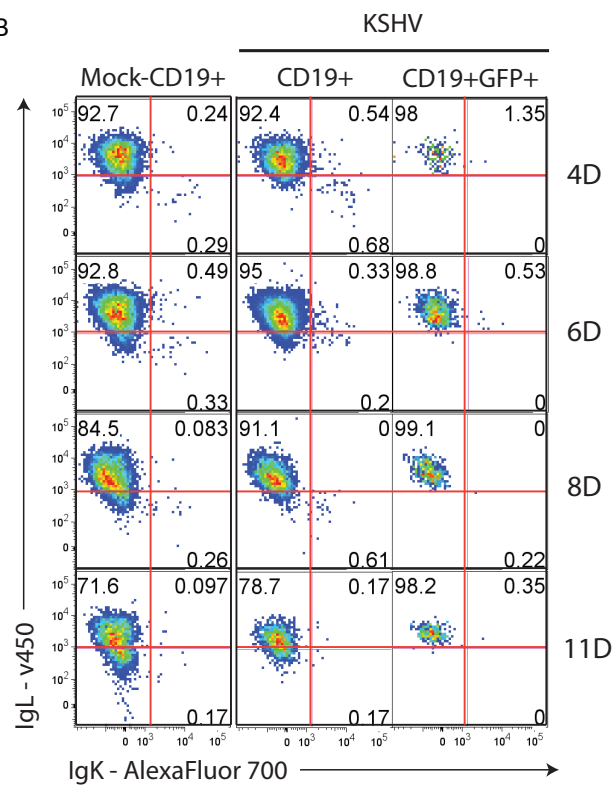

Supplement: ppat.1006967.s002.pdf [file ppat.1006967.s002.pdf]
